1 **Mouse Single Pancreatic  $\beta$  Cell Transcriptomics Reveal Sexual**  
2 **Dimorphism of Transcriptomes and Identify Sex-dependent Type**  
3 **2 Diabetes Altered Genes**

4

5 Gang Liu<sup>1,2,#,a</sup>, Yana Li<sup>3,4,#,b</sup>, Tengjiao Zhang<sup>1,#,c</sup>, Mushan Li<sup>5,#,d</sup>, Sheng Li<sup>1,2,e</sup>, Shuxin Liu<sup>1,2,f</sup>,

6 Minglu Xu<sup>1,2,g</sup>, Zhen Shao<sup>3,\*,h</sup>, Weiyang Shi<sup>6,\*,i</sup>, Weida Li<sup>1,2,\*j</sup>

7

8 *<sup>1</sup>Frontier Science Center for Stem Cell Research, School of Life Sciences and*  
9 *Technology, Tongji University, Shanghai 200092, China.*

10 *<sup>2</sup>Tsingtao Advanced Research Institute, Tongji University.*

11 *<sup>3</sup>CAS Key Laboratory of Computational Biology, CAS-MPG Partner Institute for*  
12 *Computational Biology, Shanghai Institute of Nutrition and Health, Chinese Academy*  
13 *of Sciences, Shanghai 200031, China.*

14 *<sup>4</sup>University of Chinese Academy of Sciences, Beijing 100049, China.*

15 *<sup>5</sup>Department of Statistics, The Pennsylvania State University, University Park,*  
16 *Pennsylvania 16802, USA.*

17 *<sup>6</sup>Ministry of Education Key Laboratory of Marine Genetics and Breeding, College of*  
18 *Marine Life Sciences, Ocean University of China, Tsingtao Shandong 266003, China.*

19

20 *# Equal contribution*

21 *\*Correspondence*

22 E-mail: shaozhen@picb.ac.cn (Shao Z), wshi@ouc.edu.cn (Shi W), liweida@tongji.e  
23 du.cn (Li W).

24

25 **Running title:** *Gang L et al /Mouse Single Pancreatic  $\beta$  Cell Transcriptomics Reveal*  
26 *Sexual Dimorphism of Transcriptomes and Identify Sex-dependent Type 2 Diabetes*  
27 *Altered Genes*

28 <sup>a</sup>ORCID: 0000-0003-1401-9215.

29 <sup>b</sup>ORCID: 0000-0002-3386-9090.

30 <sup>c</sup>ORCID: 0000-0001-7815-2504.

31 <sup>d</sup>ORCID: 0000-0003-2727-950X.

32 <sup>e</sup>ORCID: 0000-0002-6126-8866.

33 <sup>f</sup>ORCID: 0000-0002-4664-5512.

34 <sup>g</sup>ORCID: 0000-0001-6817-3109.

35 <sup>h</sup>ORCID: 0000-0002-4934-4360.

36 <sup>i</sup>ORCID: 0000-0002-1805-6884.

37 <sup>j</sup>ORCID: 0000-0001-6578-6321.

38

39

40 Total word counts (from Introduction to Conclusions): 3363

41 Total figures: 7

42 Total tables: 4

43 Total supplementary figures: 3

44 Total supplementary tables: 3

45 Total supplementary files: 6

46

47

48

49

50

51

52

53

54

55

## 56 **Abstract**

57 Type 2 diabetes, characterized by malfunction of pancreatic  $\beta$  cells, is affected by  
58 multiple cues including sex differences. Nevertheless, mechanisms of sex differences  
59 in type 2 diabetes susceptibility and pathogenesis remain unclear. Using single-cell  
60 RNA sequencing (scRNA-seq) technology, we showed that sexual dimorphism of  
61 transcriptome exists in mouse  $\beta$  cells. Our analysis further revealed the existence of  
62 sex-dependent type 2 diabetes altered genes in high fat diet induced T2D model,  
63 suggesting divergences in pathological mechanisms of type 2 diabetes between sexes.  
64 Our results indicated that sex should be taken into consideration when treating diabetes,  
65 which was further validated by the sex-matched and sex-mismatched islet  
66 transplantation in mice. Compared to sex-matched transplants, sex-mismatched  
67 transplants showed downregulation of genes involved in the longevity regulating  
68 pathway in  $\beta$  cells and led to impaired glucose tolerance in diabetic mice. Taken  
69 together, our findings could advance current understanding of type 2 diabetes  
70 pathogenesis with sexually dimorphic perspectives and provide new insights to the  
71 development of precision medicine.

72

73

74 **KEYWORDS:** Type 2 diabetes mellitus; Pancreatic  $\beta$  cell; Sex-biased gene expression;  
75 Sex-dependent T2D altered genes; Precision medicine

76

77

78

## 79 **Introduction**

80 The efficacy of current anti-diabetic medication varies significantly among individuals  
81 with diabetes, highlighting the importance of personalized treatment for type 2 diabetes  
82 (T2D). However, the bottleneck for precision medicine lies in the heterogeneous nature  
83 of the disease, which not only hinges on genetic predispositions that have been

84 identified by GWAS (Genome Wide Association Study), but also other cues, including  
85 sex, diet, and aging. Among these factors, sex differences should be first considered for  
86 personalized therapy since sex is one of the most recognizable traits.

87 However, in most current studies on metabolism using rodents, female animals are  
88 usually neglected, because male animals have the tendency to show better disease  
89 phenotypes and are dominantly used [1]. And this experimental bias on sex hampered  
90 novel and comprehensive acknowledgement of metabolic pathological mechanisms.  
91 Thus, the National Institutes of Health (NIH) demands sex differences should be  
92 emphasized in preclinical studies [2, 3], which should be especially stressed in T2D as  
93 a global pandemic.

94 Glucose homeostasis is controlled by pancreatic islet, which is mainly composed of  
95  $\alpha$  cells,  $\beta$  cells,  $\delta$  cells and PP cells.  $\alpha$  cells elevate glucose level by secreting glucagon  
96 to promote hepatic glucose synthesis, and  $\beta$  cells release insulin to decrease glucose  
97 level by stimulating blood glucose uptake by fat, muscle, liver, and intestine cells, etc.  
98  $\delta$  cells secrete somatostatin to downregulate hormones releasing from both  $\alpha$  cells and  $\beta$   
99 cells via paracrine signaling [4]. Polypeptide from PP cells, the most infrequent islet  
100 cell type, has effects on both gastric and pancreatic secretions [5].

101 Despite the similar cell type components of islet architecture shared by both male  
102 and female, there exist profound sex differences in islet physiological function and  
103 metabolism, signaling pathways involved in hormone releasing, and diabetes  
104 occurrence [6]. For example, female rats are more susceptible than males to  
105 streptozotocin (STZ) induced diabetes, suggesting that female rat  $\beta$  cells are more  
106 sensitive to STZ toxicity than male  $\beta$  cells [6]. Similarly, maternal high fat diet results  
107 in insulin resistance and oxidative stress-induced  $\beta$  cell loss specifically in male  
108 offsprings, rather than in female offsprings, indicating that female islets might have  
109 self-protective machinery against oxidative stress [7]. In human, type 2 diabetes occurs  
110 more frequently in men with younger age and less BMI than women [8-10]. Insulin  
111 sexual dimorphism of DNA methylation was also observed in human islets by whole

112 islet genome-wide DNA methylation sequencing. It is suggested that sex differences of  
113 methylome are associated with differences of islet genes expression and insulin  
114 secretion level [11]. However, sexual dimorphism of pancreatic islet  $\beta$  cell has not been  
115 investigated at the single cell level, and these studies could reveal sex differences of  
116 gene expression in islet  $\beta$  cells between male and female and provide better treatment  
117 plans for diabetic patients from both sex groups.

118 Sex differences in diabetes susceptibility, development and progression have been  
119 previously reported, suggesting the existence of sex-dependent diabetes associated  
120 genes. Previous studies showed that androgen receptor specifically expressed in male  
121 islet  $\beta$  cells and plays an important role in regulating glucose-stimulated insulin  
122 secretion in both mice and humans [12]. It has also been reported that *KLF14* allele  
123 variants show increased female-specific T2D risk, probably via female-specific fat  
124 storage and distribution [13]. Recent banding studies reported that single-cell RNA  
125 sequencing technology has been applied to identify novel diabetes altered genes [14-  
126 16]. Nevertheless, the diverse sex-dependent diabetes associated genes and molecular  
127 pathways have not been comprehensively investigated from these studies.

128 Here, we systematically analyzed the single cell gene expression profiles of healthy  
129 and diabetic  $\beta$  cells from mice. We found a considerable number of genes had sex-  
130 biased expression in  $\beta$  cells. Furthermore, we identified 122 sex-dependent diabetes  
131 altered genes, suggesting that the molecular mechanisms mediating diabetes  
132 pathogenesis in males and females have important differences. Based on the recognition  
133 of the sex differences in T2D altered genes and pathways in  $\beta$  cells, we concluded that  
134 sex as a biological variance should be emphasized in diabetes treatment. And this  
135 conclusion was further supported by the sex-matched and sex-mismatched islet  
136 transplantation in mice. Compared to sex-matched transplants, we found that genes  
137 involved in the longevity regulating pathway tended to be down-regulated in  $\beta$  cells of  
138 sex-mismatched transplants, and glucose tolerance notably decreased in diabetic mice  
139 transplanted with sex-mismatched islets. Together, our results not only advanced

140 current understanding of T2D pathogenesis, but also provided new insights and targets  
141 for developing sex-dependent precision medicine to treat diabetes.

142

## 143 **Results**

### 144 **Identification of male and female pancreatic $\beta$ cell transcriptomes in mouse**

145 To obtain expression profiles of mouse pancreatic  $\beta$  cells, we employed flow cytometry  
146 to isolate single islet cells from dissociated mouse islets with live dye staining (**Figure**  
147 **1A**). Totally, we collected and sequenced 5472 islet cells (3264 male; 2208 female)  
148 from both male and female mice, including 1056 islet cells (1056 male; 768 female) of  
149 8-week-old healthy mice, 2208 islet cells (1152 male; 1056 female) of 9-month-old  
150 healthy and diabetic mice, 672 male transplanted islet cells (9 months post-transplant)  
151 in kidney capsules of both male and female recipient mice, and 768 endogenous  
152 pancreatic islet cells (384 male; 384 female) of recipient mice (detailed sample  
153 information in **Table 1**). Single-cell RNA sequencing library was constructed by a  
154 modified Smart-seq2 protocol. The average library size is 370K reads per cell, and the  
155 average number of genes detected in these cells is about 1500 per cell. We retained  
156 4662 cells that have at least 500 genes detected (Figure S1A). The retained cells had  
157 high total counts of unique molecular identifiers (UMIs) mapped to gene exons (Figure  
158 S1B), and low fractions of UMI counts of mitochondrial genes (Figure S1C),  
159 suggesting we obtained a set of qualified scRNA-seq profiles of mouse islet for the  
160 main purpose of this study.

161 From these 4662 cells, we went on to identify  $\beta$  cells for downstream analysis.  
162 Firstly, we applied an adjusted CPM method (adjCPM) to normalize our scRNA-seq  
163 data by excluding the union of the top 2 genes with the highest expression from all cells  
164 while calculating the normalization factors (Figure S1D and S1E; see Methods).  
165 Secondly, hierarchal clustering of scRNA-seq profiles based on the union of the top 10  
166 highly expressed genes from all cells was used to discriminate the identity of the cells  
167 (Figure S1F). After performing principal component analysis with the identified hyper

168 variable genes (HVGs) and subsequent visualization by t-distributed stochastic  
169 neighbor embedding (t-SNE) (Figure S1G; see Methods), the retained islet cells of  
170 healthy (8-week-old; 9-month-old) and diabetic mice were found to be aggregated into  
171 two clusters exhibiting differential expression of  $\beta$  cell marker gene *Ins2* (**Figure 1B**  
172 **and 1C**). Then, 3912  $\beta$  cells (2197 male; 1715 female) from mice in different conditions  
173 were identified through high expression of *Ins2* (**Figure 1C** and S4A). The sex of mouse  
174  $\beta$  cells was labeled on the t-SNE map (male in blue; female in red; **Figure 1D**), and  
175 further confirmed by X and Y chromosome genes (Figure S2B). We found male and  
176 female  $\beta$  cells were not completely overlapped on the t-SNE plot (Figure 1D). To verify  
177 the existence of sexually dimorphic gene expression, we applied Kolmogorov-Smirnov  
178 test (K-S test) to analyze the differential expression of *Ins2* between male and female  $\beta$   
179 cells, and found its expression was significantly different between two sexes (**Figure**  
180 **1D**), indicating sexual dimorphism of  $\beta$  cell transcriptomes exist in mouse and could be  
181 important to  $\beta$  cell functions.

182

### 183 **Sex-biased gene expressions in mouse $\beta$ cells under healthy and T2D conditions**

184 To identify genes that display sex-biased expression pattern in mouse pancreatic  $\beta$  cells,  
185 we first compared the transcriptional profiles of male  $\beta$  cells with female  $\beta$  cells from  
186 8-week-old C57BL/6J mice (**Figure 2A**). Differentially expressed genes were sorted  
187 out by MAST [17], with a FDR cutoff of 0.05 (the same cutoffs were used for all the  
188 differential analysis using MAST in our study). In total, we obtained 162 differentially  
189 expressed genes (DEGs), comprising 37 genes expressed higher in male and 125 genes  
190 expressed higher in female (**Figure 2A**). Among them, only four genes were on the sex  
191 chromosomes, including X chromosome (*Xist*) and Y chromosome (*Eif2s3y*, *Ddx3y*,  
192 *Uty*) (**Figure 2B**), suggesting that considerable level of sexual dimorphism exist in  
193 healthy  $\beta$  cell transcriptomes.

194 To investigate whether such sexually dimorphic  $\beta$  cell transcriptomes also exist in  
195 diabetic conditions,  $\beta$  cells from high-fat-diet (HFD) induced diabetic mice were

196 collected for scRNA-seq. Firstly, we used HFD to induce T2D model with  $\beta$  cell failure  
197 in C57BL/6J mice (fed with HFD from 8-week-old) as previously described [18].  
198 Consequently, characteristic T2D phenotypes were observed in those diabetic mice of  
199 both male and female, including high body weight, increased fasting insulin level, and  
200 impaired glucose tolerance. Notably, sex differences of T2D were also observed: the  
201 fasting serum insulin level of healthy male mice is significantly higher than healthy  
202 female mice (Figure 2C). In addition, the area under curve (AUC) of glucose tolerance  
203 test showed that the impairment of glucose tolerance in female T2D mice was more  
204 significant than that in male T2D mice, as p value of female T2D  $<0.001$  and male  
205 T2D  $<0.01$  (Figure 2D). Then, to explore the genetic basis for such differences, we  
206 obtained single  $\beta$  cell transcriptomes from 9-month-old diabetic mice (HFD feeding up  
207 to 7 months) and age-matched healthy mice (normal diet, ND) of both sexes. The  
208 comparison of single  $\beta$  cell transcriptional profiles of male and female from either  
209 healthy or T2D mice was carried out by MAST with the same cutoffs as described  
210 above. As shown in the results, 394 DEGs between male and female in 9-month-old  
211 healthy mice were identified, including 200 genes expressed higher in male and 194  
212 genes expressed higher in female. In parallel, 81 male highly expressed genes, and 52  
213 female highly expressed genes were identified in  $\beta$  cells from T2D mice (Figure 2E).

214 To further elucidate sex-biased pathways based on these comparisons, gene set  
215 enrichment analysis (GSEA) was performed with the cutoff set as  $FDR \leq 0.25$  (the  
216 same cutoff was used for all GSEA in our study) [19]. In  $\beta$  cells from both 8-week-old  
217 and 9-month-old healthy animals, the longevity regulating pathway was enriched in  
218 males, and related genes (*Ins1*, *Ins2*, *Irs2*, *Hspa1a*, *Hspa8*) were expressed significantly  
219 higher in males (Figure 2F; S2C and S2D). Intriguingly, the ribosome pathway was  
220 consistently enriched in females in  $\beta$  cells from both healthy (8-week-old; 9-month-old)  
221 and diabetic mice (Figure S2C; S2D and S2E). Importantly, in  $\beta$  cells from diabetic  
222 mice, both the N-Glycan biosynthesis pathway and Notch signaling pathway were  
223 enriched in males. Conversely, the JAK-STAT signaling pathway, ferroptosis pathway,



224 spliceosome pathway, carbohydrate digestion and absorption pathway were enriched in  
225 female  $\beta$  cells from diabetic mice (Figure S2E). Expression patterns of representative  
226 sex-biased DEGs involved in the GSEA results were shown in the heatmap (Figure 2F).  
227 Above all, our results validated the existence of sex-biased gene expression in  $\beta$  cells  
228 of both healthy and diabetic mice, indicating that the pathological mechanism of T2D  
229 might differ between males and females.

230

### 231 **Abundant sex-dependent T2D altered genes were found in mouse $\beta$ cells**

232 Given the sex-biased gene expressions detected in T2D  $\beta$  cells, we hypothesized T2D  
233 development may differ in males and females. Previous studies compared the single-  
234 cell transcriptional profiles of T2D islets with that of healthy islets to identify T2D  
235 altered genes [14-16] without considering the factor of sex. To dissect that in a sex-  
236 dependent manner, we compared the single-cell transcriptome of  $\beta$  cells from T2D mice  
237 with that from age-matched healthy mice. Firstly, we did a sex-independent comparison,  
238 in which  $\beta$  cells from both sexes were used for differential analysis, and we defined 98  
239 sex-independent genes. Then, we compared the diabetic  $\beta$  cells with healthy  $\beta$  cells of  
240 the same sex to obtain DEGs in either male or female specific manner, and consequently  
241 compared the DEGs of each sex with the 98 sex-independent genes. The non-  
242 overlapping parts were defined as sex-dependent T2D altered genes, including 57  
243 female-dependent and 66 male-dependent genes (Figure 3A and 3B), among which the  
244 *Spc5* was upregulated in female diabetic  $\beta$  cells but down-regulated in male diabetic  $\beta$   
245 cells (Figure S3A).

246 To note, among the female-dependent T2D altered genes, the top 5 up-regulated  
247 genes were *Fxyd2*, *Hsp8*, *Cpe*, *G6pc2* and *Serp1*, while the top 5 down-regulated genes  
248 were *Sdf2l1*, *Ssr4*, *Shisal2b*, *Chac1*, *Ewsr1* (Figure S3A). Notably, according to  
249 previous reports, the *Fxyd2* knock-out mice showed significantly improved glucose  
250 tolerance and enlarged islet size, suggesting its negative regulation of islet growth [20].  
251 *Hsp8/HSC70* encodes the heat-shock cognate protein 70, which was recognized as an

252 endogenous danger signal in  $\beta$  cell to trigger inflammation in diabetes [21]. *Cpe*  
253 encodes Carboxypeptidase E, which plays a role in insulin synthesis by regulating  
254 proinsulin to insulin conversion for insulin synthesis [22]. The upregulation of *Cpe* was  
255 in line with the increased fasting serum insulin level observed in the T2D mice (Figure  
256 2C). The *G6pc2* has been reported to be a negative regulator for glucose stimulated  
257 insulin secretion in mice, and its deletion results in female specific body fat reduction  
258 [23], which supports our concept of sex-dependent T2D altered gene.

259 In parallel, among the male-dependent T2D altered genes, the top 5 genes up-  
260 regulated in T2D were *Iapp*, *P4hb*, *Rps29*, *Trpm5*, and *Gabbr2*, while the top 5 genes  
261 down-regulated in T2D were *Cox4i1*, *Malat1*, *Ubb*, *Nisch*, *Ndufb7* (Figure S3A). *Iapp*  
262 encodes islet amyloid polypeptide, whose aggregation results in  $\beta$  cell failure and T2D  
263 onset [24]. *P4hb* encodes protein disulfide isomerase A1, whose expression is essential  
264 for maturation of proinsulin and survival of  $\beta$  cell in high-fat diet fed mice [25]. *Trpm5*  
265 encodes transient receptor potential channel type M5, whose deletion can reduce body  
266 weight gain and improve glucose tolerance in mice fed with high calorie diet  
267 [26]. Collectively, these results demonstrated that abundant genes expression was  
268 altered under T2D diabetic condition in a sex-dependent manner.

269 To further systematically investigate the sex differences in T2D altered pathways,  
270 GSEA was performed based on comparison of  $\beta$  cells from T2D and healthy mice of  
271 each sex. In females, several pathways enriched in T2D- $\beta$  cells such as pancreatic  
272 secretion pathway and longevity regulating pathway (multiple species) have direct links  
273 to  $\beta$  cell function and onset of T2D. Conversely, oxidative phosphorylation pathway  
274 and ribosome pathway were enriched in healthy  $\beta$  cells. At the same time, in males,  
275 T2D- $\beta$  cells had ribosome pathway enriched and healthy  $\beta$  cells had type 2 diabetes  
276 mellitus pathway enriched (Figure 3C and 3D). The expression patterns of genes  
277 involved in the pathways mentioned above were shown in the heatmap (Figure 3E) and  
278 violin plots (Figure S3B). Altogether, both the distinctive patterns of sex-dependent

279 T2D altered genes and different T2D associated pathways suggested divergence of T2D  
280 pathogenesis between sexes.

281

282 **Mice with sex-matched  $\beta$  cell transplant exhibited better control of glucose**  
283 **homeostasis**

284 Altogether, the existence of sexual dimorphism in mouse  $\beta$  cell transcriptome informed  
285 us that sex as an important factor in  $\beta$  cell function and pathogenesis of T2D should be  
286 emphasized when treating diabetes. In order to validate this critical concept, islet  
287 transplantations (an experimental treatment for insulin insufficient diabetes mellitus)  
288 with sex-matched and sex-mismatched islets were performed in mice. Male islets were  
289 isolated from 6-8 weeks old mice and transplanted into kidney capsules of age-matched  
290 male and female mice, respectively. Transplanted islets (TX-islet) and endogenous  
291 islets (Endo-islet) from recipient mice were all collected and dissociated for scRNA-  
292 seq profiling, 9 months post-transplant (**Figure 4A**). Firstly, the  $\beta$  cells were identified  
293 by high expression of *Ins2* as previously described (**Figure 4B**), and the transcriptomes  
294 of sex-matched and sex-mismatched transplant- $\beta$  cells were compared with that of male  
295 and female endogenous  $\beta$  cells, respectively (**Figure 4C**). The correlation analysis  
296 revealed that the overall sex-matched transplant- $\beta$  cell transcriptomes were closer to  
297 endogenous islet  $\beta$  cells from both male and female recipients (**Figure 4C**). Secondly,  
298 transplant- $\beta$  cell transcriptomes were directly compared between sex-matched and sex-  
299 mismatched groups for DEGs. Sex-matched transplant- $\beta$  cells had 3 genes (*Kap*, *Sfrp5*  
300 and *Akr1c21*) significantly up-regulated and 2 genes (*Ovol2*, *Matn2*) significantly  
301 down-regulated (Figure S3C and S3D). Notably, *Sfrp5* was a conservative male-biased  
302 expression gene in 8-week-old and 9-month-old healthy  $\beta$  cell (Table S1), previous  
303 study reported that overexpression of *Sfrp5* (down-regulated in obesity and T2D) can  
304 ameliorate impaired glucose tolerance in mice [27]. In humans, high level of serum  
305 SFRP5 was correlated with lower risk of T2D onset [28]. Moreover, the results of  
306 GSEA showed that longevity regulating pathway-multiple species was significantly

307 enriched in  $\beta$  cells of sex-matched transplant-islets and among the 16 leading-edge  
 308 genes, *Ins2*, *Sod1*, *Sod2* and *Foxa2* are directly linked to  $\beta$  cell secretion (**Figure 4D**).  
 309 Collectively, these results suggested that sex-matched islet transplantation could be  
 310 more beneficial to the function of  $\beta$  cells of the transplants, thus better controlling  
 311 glucose homeostasis.

312 To further validate the advantage of sex-matched transplantation, we transplanted  
 313 islets from male and female mice into streptozotocin induced female diabetic mice,  
 314 respectively (**Figure 4E**). Although the hyperglycemia (>350 mg/dl) of the diabetic  
 315 recipient with sex-matched or sex-mismatched transplantation restored to normal levels  
 316 1 month post-transplant (<144 mg/dl; Figure S3E), the glucose tolerance of the diabetic  
 317 mice with sex-matched transplantation was significantly better as evidenced by the oral  
 318 glucose tolerance test (**Figure 4F**). Above all, our scRNA-seq analysis of  $\beta$  cells and  
 319 experimental validation concluded that sex should be taken into consideration in  
 320 diabetes treatment.

321

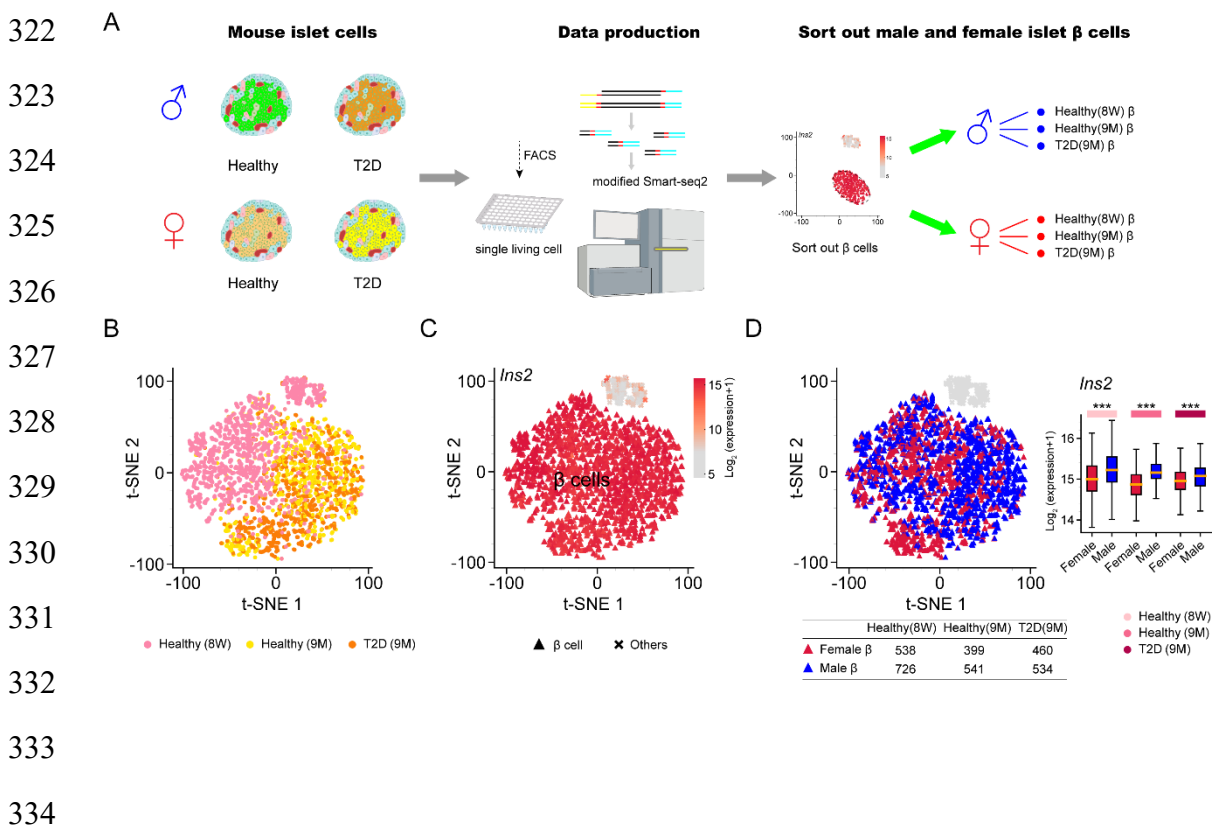

335

A

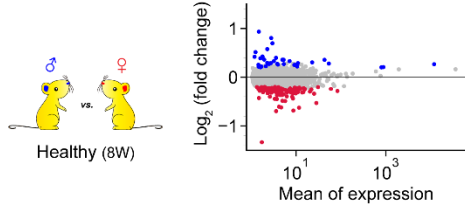

336

337

338

B

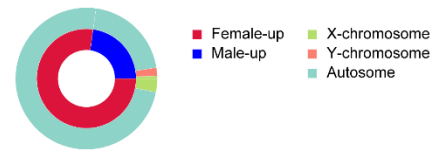

339

340

341

342

C

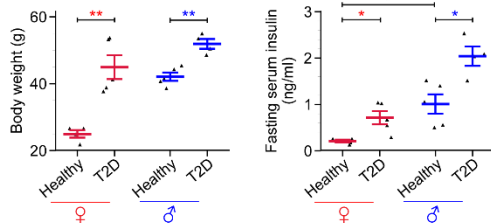

D

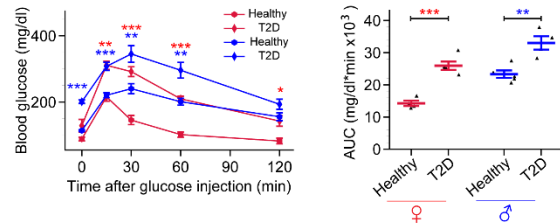

343

E

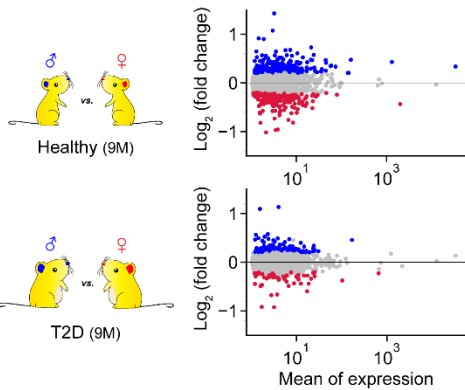

F

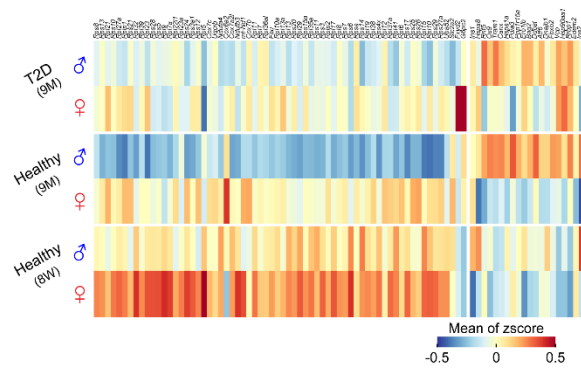

349

350

351

352

353

354

355

356

357

358

359

360

361

362

363

364

365

366

367

368

369

370

371

372

373

374

375

376

377

378

379

380

381

382

383

384

385

386

387

388

389

390

A

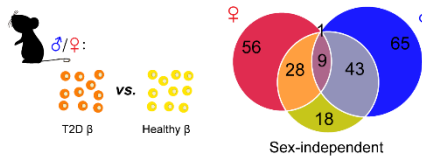

B

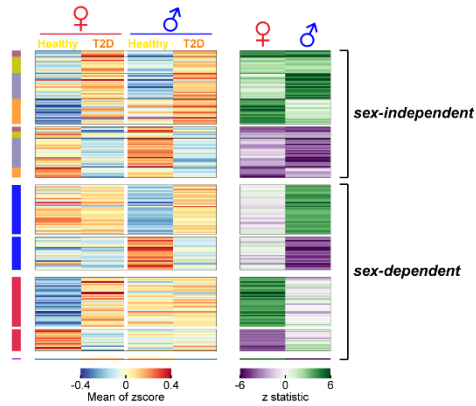

C

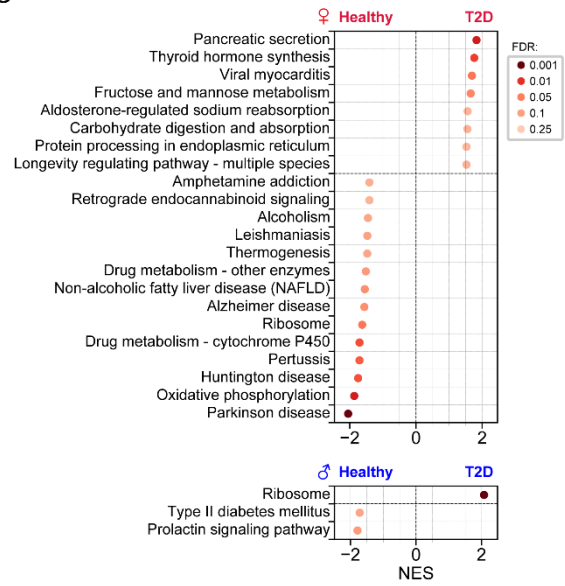

D

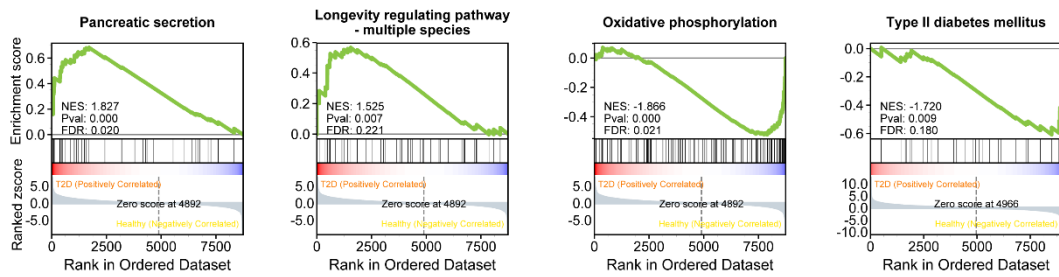

E

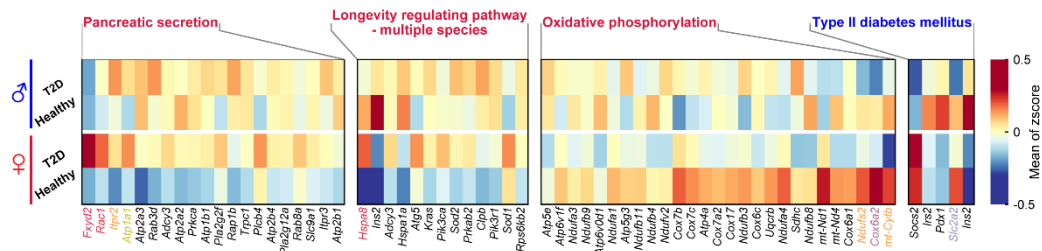

391

392

393

394

395

396

397

398

399

400

401

402

403

404

405

406

407

408

409

410

411

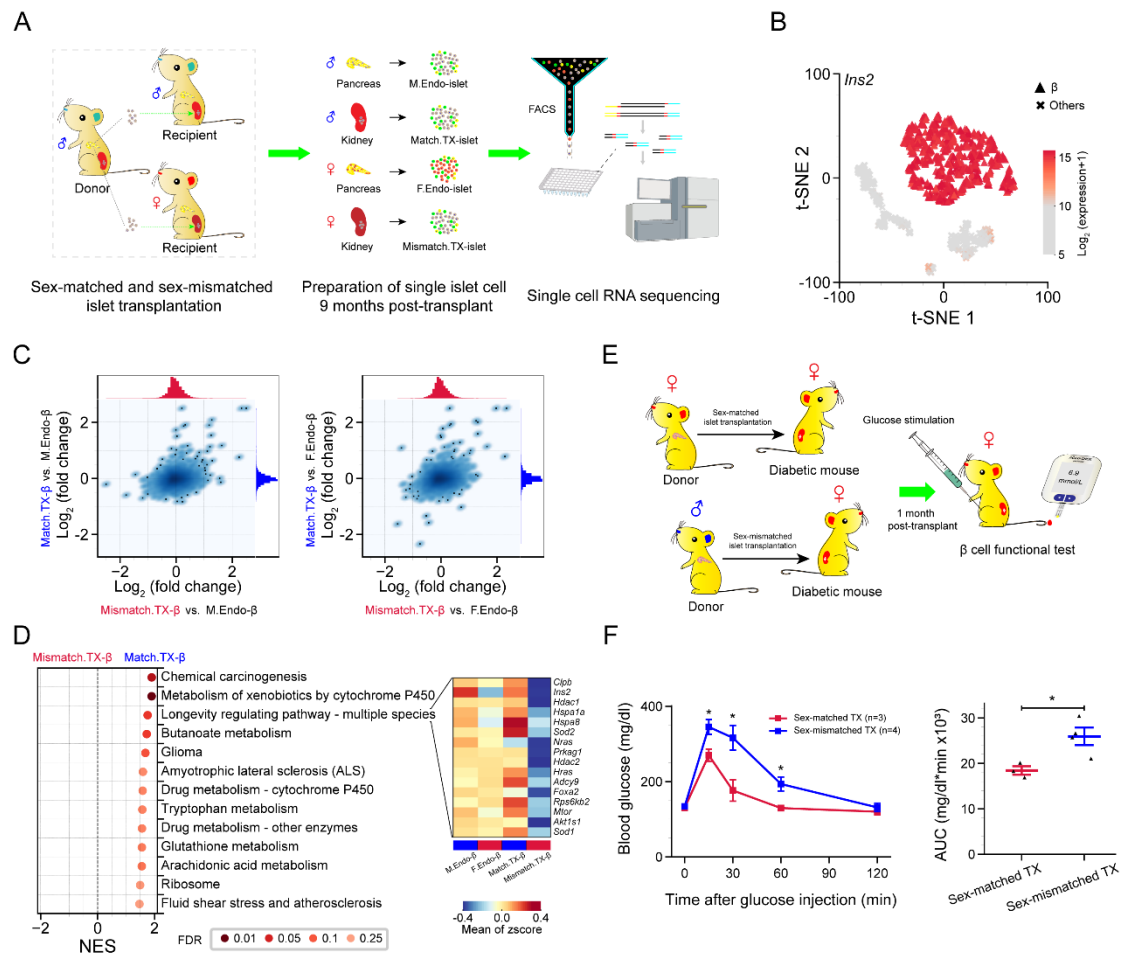

| Strain   | Age       | Condition      | Theoretic number of cells | Total |
|----------|-----------|----------------|---------------------------|-------|
| C57BL/6J | 6-8 weeks | Healthy        | Male:1056 Female:768      | 1824  |
| C57BL/6J | 9 months  | Diabetic (HFD) | Male:576 Female:576       | 1152  |
| C57BL/6J | 9 months  | Healthy(ND)    | Male:576 Female:480       | 1056  |
| ICR      | 11 months | Endogenous     | Male:384 Female:384       | 768   |
| ICR      | 11 months | Transplanted   | Male:288 Female:384       | 672   |
| Total    |           |                | 5472                      |       |

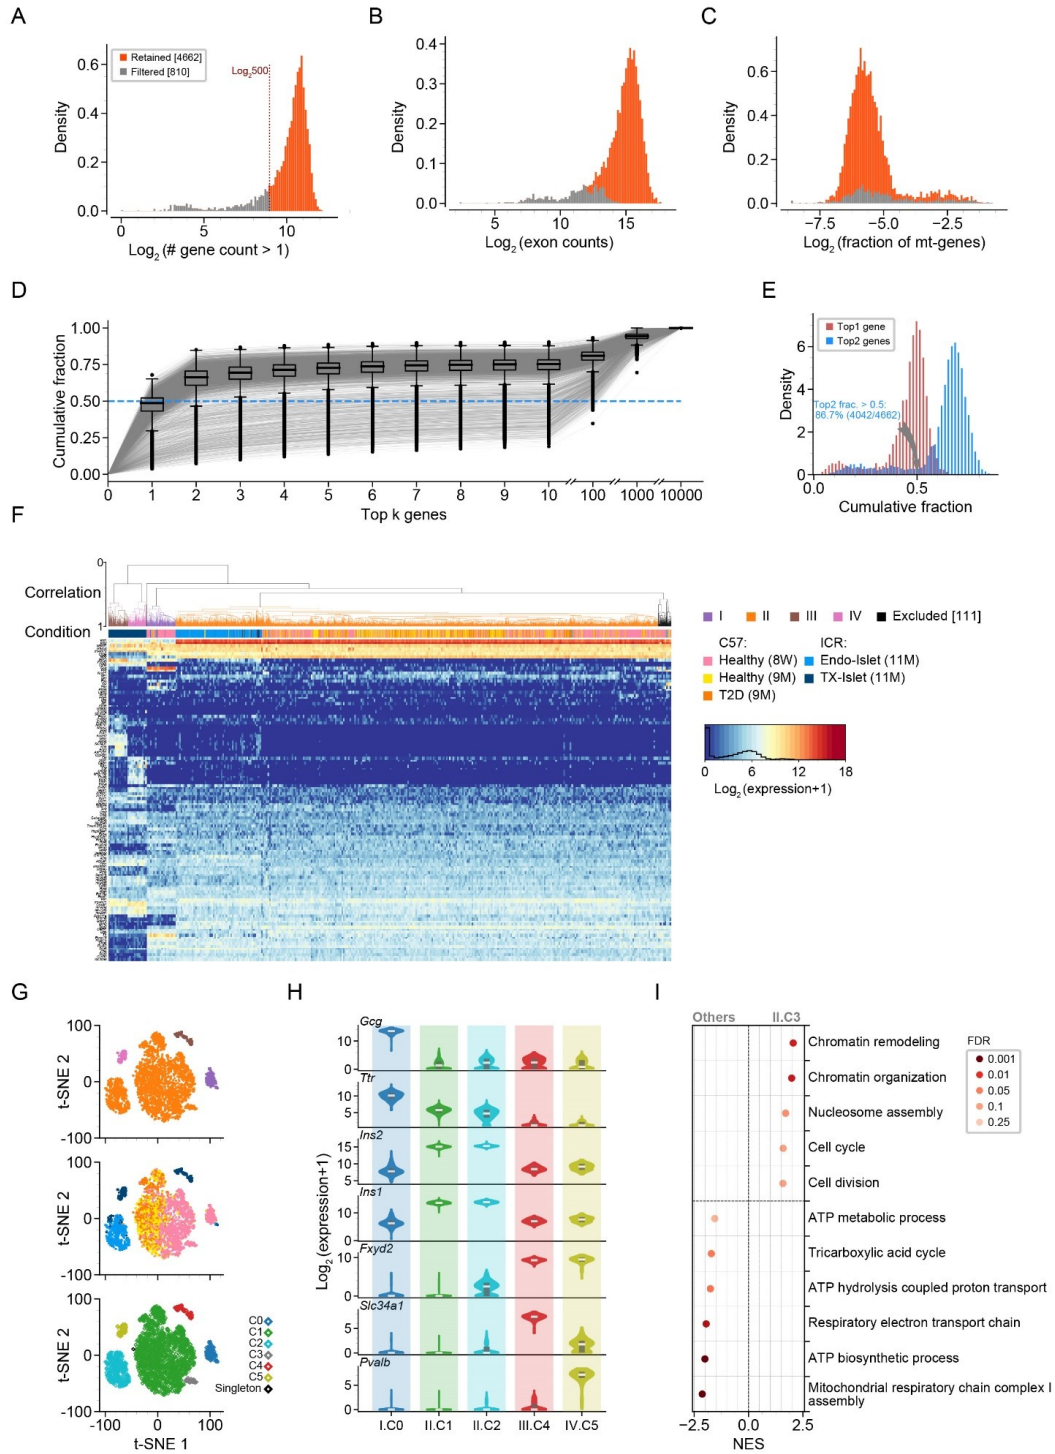

412

413

414

415

416

417



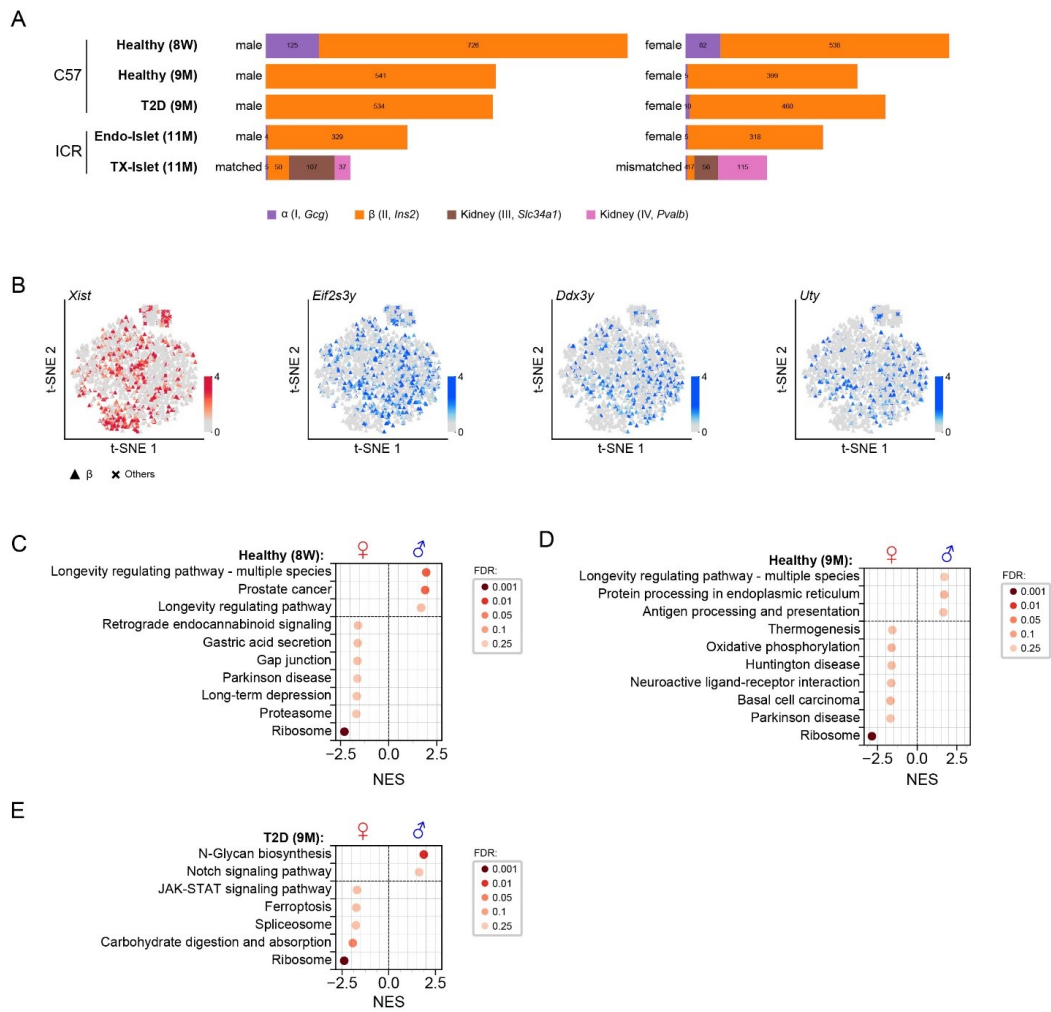

418

419

420

421

422

423

A

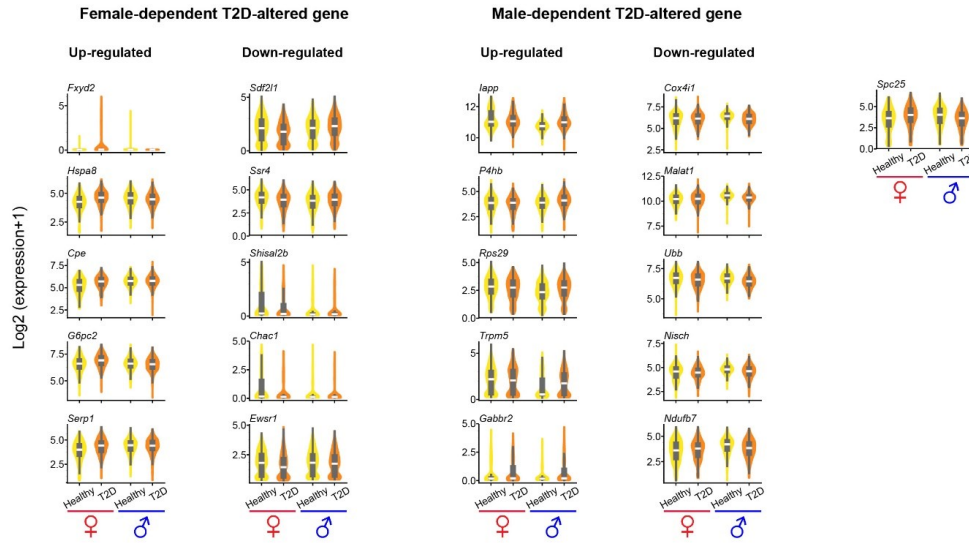

B

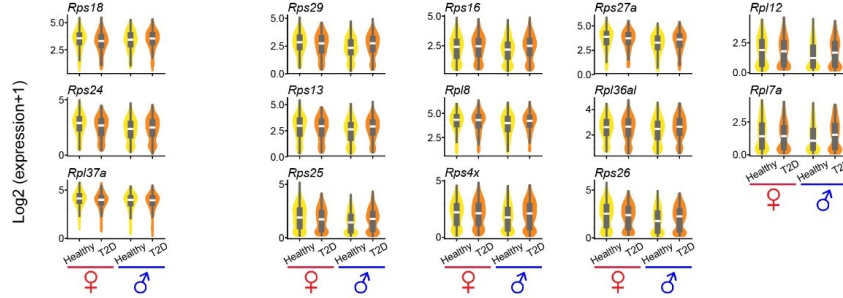

C

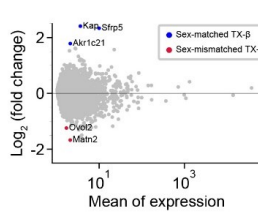

D

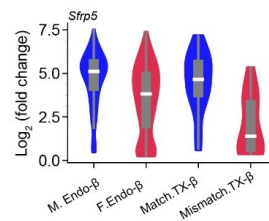

E

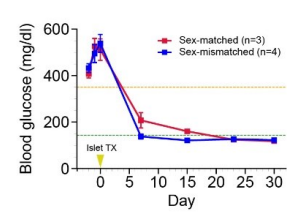

424

425

426

427

428

429

## 430 **Discussion**

431 According to previously published work, it has been well recognized that sexual  
432 dimorphism exists in many organs or systems, such as heart, kidney and immune  
433 responses [29-31]. What's more, a recent study in humans has shown that sexual  
434 dimorphism not only exhibits in neuron cells, but also is associated with susceptibility  
435 of mental diseases [32]. Herein, T2D is a complex metabolic disorder characterized  
436 with islet  $\beta$  cell failure and impacted by sex. Sex differences in islet  $\beta$  cell physiological  
437 function and diabetes prevalence have been recognized, but still need to be better  
438 understood. To decipher the sexually dimorphic T2D pathogenesis, we used scRNA-  
439 seq to comprehensively measure the transcriptomes of healthy and diabetic  $\beta$  cells from  
440 mice of both sexes. We identified abundant genes have significantly sex-biased  
441 expression in  $\beta$  cells of both healthy and T2D mouse. Besides, we found longevity  
442 regulating pathway was male specific enriched in healthy  $\beta$  cells. Furthermore, we  
443 identified 122 sex-dependent T2D altered genes in mouse, suggesting important  
444 differences in the molecular mechanisms of diabetes pathogenesis between males and  
445 females in mouse T2D model. Collectively, these results provided innovative sex-  
446 specific targets for future studies on the precision treatment of T2D.

447 In current clinical trials of islet transplantation, sex matching between donor and  
448 recipient has not been stressed. Based on the recognition of sex differences in the  
449 transcriptome of  $\beta$  cells, we concluded that sex as a crucial biological variance should  
450 be emphasized in the treatment of diabetes. And this conclusion was further supported  
451 by the sex-matched and sex-mismatched islet transplantation in mice. Compared with  
452 the sex-mismatched group, the  $\beta$  cells of transplants in the sex-matched group showed  
453 significant enrichment of the longevity regulating pathway (consistent with the results  
454 of Figure S2C and S2D) and glucose tolerance notably improved. For better curative  
455 effect, our result raised the necessity for sex-matched islet transplantation, and even for  
456 sex-matched stem cell-based cell replacement therapy for diabetes treatment.

457 Beyond the islet  $\beta$  cells focused in this study, sex differences of T2D susceptibility  
458 were also associated with sex steroid hormones. It has been found that endogenous  
459 estrogens are protective against T2D in females and the risk of T2D increases following  
460 menopause [33, 34]. Estrogen not only improves islet  $\beta$  cell function and survival [35],  
461 but also stimulates the secretion of GLP-1 by both islet  $\alpha$  cells and intestine L cells to  
462 maintain glucose homeostasis [36]. Along with that, deficiency of the male sex  
463 hormone, testosterone, increases the T2D risk in male [37, 38]. Furthermore, a recent  
464 report revealed that testosterone improves insulin secretion through androgen receptor  
465 on male islet  $\beta$  cells in both mouse and human [12]. Taken together, sex differences in  
466 both islet  $\beta$  cells and sex steroid hormones need to be highlighted in the development  
467 of sex-specific precision medicine.

468

## 469 **Materials and methods**

### 470 **Animals and high fat diet induced diabetic mice**

471 All experiments were performed in accordance with the University of Health Guide for  
472 the Care and Use of Laboratory Animals and were approved by the Biological Research  
473 Ethics Committee of Tongji University. We housed all the mice under the specific  
474 pathogen free grade environment of animal facility at Tongji University, Shanghai,  
475 China. Adult male and female mice (6-8 weeks old) were purchased from Shanghai  
476 Slac Laboratory Animal. To induce mouse T2D model, male and female C57BL/6J  
477 mice (n=5 per sex) were fed with high-fat diet from 8-week-old to 9-month-old as a  
478 high-fat-diet (HFD) group, and equal number of male and female mice were fed up with  
479 normal diet (ND) in an age-matched way to a control potential confounding factor, age.

480

### 481 **Islet transplantation**

482 Islets were isolated from 6-8 weeks old male ICR mice (n=20), and the detailed process  
483 of islet isolation was as previous description [39]. Similar size islets were handpicked  
484 after purification under a stereomicroscope, and 3 age-matched healthy male and 3

485 female ICR mice were selected as a recipient with about 300-400 islets were  
486 transplanted under the kidney capsule. About 9 months later, transplanted islets were  
487 dissected and scraped from the kidney capsule, and the pellet was collected and  
488 dissociated into a single cell for scRNA-seq in two batches. At the same time, the  
489 endogenous islets of recipient mice were also isolated and dissociated into a single cell  
490 for scRNA-seq. Diabetic mice and islet transplantation were both performed as  
491 previous description [39]. Adult male and female C57BL/6J mice were selected as islet  
492 donor, and age-matched female C57BL/6J mice were chosen as recipient. C57BL/6J  
493 mice were injected with STZ at the dose of 170 mg/kg after 6 hours of fast. Mice that  
494 exhibited non-fasting hyperglycemia (>350 mg/kg) with 3 consecutive detection were  
495 regarded as diabetic mice for islet transplantation. Each diabetic mouse was  
496 transplanted with about 350 islets, and mice that non-fasting blood glucose (<144  
497 mg/kg) recover normal were selected for physiological experiments 1 month post-  
498 transplant.

499

#### 500 **Preparation of single islet cells**

501 Mouse islets were isolated from either 6-8 weeks old male or female C57BL/6J and  
502 ICR mice. For islets isolation, 0.5 mg/mL collagenase P (Roche) was poured into  
503 pancreas by perfusion of the common bile duct. After digestion, islets were purified  
504 through Histopaque (Sigma) gradient centrifugation. The Histopaque buffer was made  
505 with mixing Histopaque-10771 and Histopaque-11191 together as the ratio of 5:6.  
506 Purified islets were dissociated into single cells as follows: washed the islets with cold  
507 PBS at least two times, spun at 1000 rpm for 2 minutes, then replace PBS with 1mL  
508 TrypLE Express (Gibco) and incubated at 37°C for 10-15 minutes with pipetting cell  
509 pellet by using P1000 pipette gently. Stop the reaction with low glucose DMEM  
510 (containing 10% FBS, 1% HEPES, 1% PenStrep), and centrifuged cells at 4°C, 1000  
511 rpm for 2 min. Then washed the cell pellet with cold PBS for 1 time, and the  
512 resuspended cells in PBS (containing 0.5%BSA) was filtered with a 40-micrometer

513 strainer to get single cell suspension. To obtain live single cell, Calcein Blue, AM  
514 (Invitrogen) was used to measure the viability of cell and high viability single cell was  
515 sorted by using BD FACS Aria II flow cytometry. Single islet cell was sorted into 96-  
516 well plates containing lysis buffer.

517

### 518 **Library construction and NGS sequencing**

519 Single-cell RNA-seq libraries were constructed according to Smart-seq2 protocol  
520 except that oligod (T) primers comprising 16bp cell barcode sequence and 9bp  
521 molecular barcode sequence were used to allow sample pooling and molecular counting.  
522 In addition, part of Truseq read2 sequence was used to replace ISPCR sequence in the  
523 oligod (T) primer thus to be compatible with Illumina sequence platform. Cells in lysis  
524 buffer were denatured, reverse transcribed in the presence of template switching oligos  
525 and pre-amplified by adding both ISPCR and ISPCR-read2 primers with 24 PCR cycles.  
526 cDNA of cells with different barcodes were then pooled together and were purified  
527 using 0.8x AMPure XP beads. Homemade Tn5 enzyme was used to tagment cDNA.  
528 Final amplification was processed using P7-index primers (Truseq) and P5-index  
529 primers (Nextera). Sequencing libraries were purified twice using 0.6x AMPure XP  
530 beads and once with 1x AMPure XP beads, and were sequenced on Illumina HiSeq X10  
531 platform with default parameters. Primer and adaptor sequences were all listed in  
532 supplementary Table S3 (information of barcode).

533

### 534 **Physiology experiment**

535 For intraperitoneal injection glucose tolerance test, normal diet and high-fat diet feeding  
536 mice fasted for 16 hours. 1 g/Kg body weight of glucose was intraperitoneally injected,  
537 and blood glucose was measured at time point of 0 min, 15 min, 30 min, 60 min, 120  
538 min after glucose injection using glucometer (ACCU-CHEK). Blood samples were  
539 collected from the mice that fasted for 6 hours, to measure the insulin level by using  
540 Mouse Ultrasensitive Insulin ELISA Kit (ALPOC). For oral glucose tolerance test,

541 mice were fasted for 6 hours, and glucose was gavaged at a dose of 2 g/Kg. Tail blood  
542 was collected for blood glucose detection, at time point of 0 min, 15 min, 30 min, 60  
543 min, 120 min, using glucometer (ACCU-CHEK).

544

## 545 **Quantification and statistical analysis**

### 546 *Preprocessing before normalization*

547 Reads were stored in paired-end fastq format. Reads of one end of fragment contain  
548 cell barcode and UMI information which was subsequently extracted and added to the  
549 name of corresponding reads of the other end in fastq file containing molecular  
550 sequence. That barcode/UMI information was in fastq-R2 files. Next, the generated  
551 single-end fastq files were cleaned by Trim Galore!  
552 [http://www.bioinformatics.babraham.ac.uk/projects/trim\\_galore/](http://www.bioinformatics.babraham.ac.uk/projects/trim_galore/) with the parameter --  
553 length 30.

554 Then, the FastQC <https://www.bioinformatics.babraham.ac.uk/projects/fastqc/> was  
555 applied to check reads quality before subsequent alignment on mm9 genome using  
556 STAR [40]. The parameters of STAR software were --AlignEndsType EndToEnd --out  
557 FileterMismatchNoverReadLmax 0.04 --outSAMattrIHstart 0 --outSAMmultNmax 1 -  
558 -outFilterMultimapNmax 1. GTF file of mm9 reference genome was derived from the  
559 RefSeq gene annotation [41] file downloaded from UCSC genome browser database ,  
560 <http://genome.ucsc.edu/cgi-bin/hgGateway?db=mm9>. After alignment, SAM files  
561 underwent demultiplexing by Catadapt <https://github.com/marcelm/cutadapt/releases>  
562 with --overlap 16 --no-indels --match-read-wildcards parameters; reads were removed  
563 if they were assigned to more than one cells. Then, we removed PCR duplicates by  
564 UMI-tools [42]. Next, featureCounts [43] was utilized to quantify gene expression  
565 levels according to the above mentioned GTF file. Once the expression profiles were  
566 generated, cells with fewer than 500 expressed genes (UMI count > 1) were considered  
567 low-quality and were removed (Figure S1). The fraction of transcripts from  
568 mitochondrial genes in each single cell was investigated as it was used as an indicator

569 for general quality control. Part of our ICR cells had high transcripts fraction of  
570 mitochondrial genes, which can be accounted for that kidney cells intrinsically express  
571 high-level mitochondrial genes [44]. So we kept those cells for analysis because our  
572 transplantation cells were under renal capsule and either kidney cells or affected  
573 transplant cells may well be introduced in our data. Next, only genes expressed (UMI  
574 count > 1) in 5 or more cells were used for further analysis. Eventually, there are 14,152  
575 genes and 4662 cells retained in mouse scRNA-seq data. The sample information of the  
576 Illumina high-throughput sequencing data is listed as following table.

577

### 578 *Normalization*

579 Here we used an adjusted count per million (CPM) normalization method, named  
580 adjCPM. The CPM method assumes that the total molecule reads are equal among cells.  
581 Similarly, our adjCPM method has an assumption except excluding a few genes in  
582 calculating the total number of molecular reads of each cell. It is based on the  
583 observation that sometimes a few top expressed genes can possess more than 50% total  
584 UMI count (Figure S1). These genes were selected as union set of the top 2 expressed  
585 genes of single cells in which the sum of the corresponding top 2 genes' UMI counts is  
586 beyond 50% of the total count of the cell. Specifically, we obtained 9 genes (*Gcg*, *Ins1*,  
587 *Ins2*, *Malat1*, *Ppy*, *Pyy*, *Rn45s*, *Ttr*, *mt-Rnr2*) and they were excluded when calculating  
588 the total count of each cell. It is well known that the scRNA-seq experiments are  
589 affected by drop-out events especially for UMI method. Here, we also observed that  
590 many genes have zero expression value because of insufficient detection power or  
591 intrinsically under-expressed. To address this issue, SAVER [45] was applied to  
592 recover gene expression in the entire matrix.

593

### 594 **Cell type identification**

595 Since cell type identification is critical for the rest analysis, two steps were carried out  
596 to robustly define the cell type. Firstly, we selected the top 10 expressed genes of each



597 cell, resulting in a total of 118 genes to perform the subsequent hierarchical clustering  
598 analysis. Accordingly, we primarily assigned 4 clusters of single cells after removing  
599 111 cells which had ulterior distance in clustering dendrogram and annotated each  
600 cluster based on marker gene expression (Figure S1).

601 Secondly, by a lowess regression between the Log<sub>2</sub> mean and Log<sub>2</sub> coefficient of  
602 variance of each gene's normalized UMI count across all single cells, we selected 3000  
603 genes according to the residue of lowess regression as hypervariable genes (HVGs).  
604 Next, principal component analysis (PCA) was applied to the Log<sub>2</sub> transformed  
605 normalized expression of these HVGs using *sklearn* [46] after centering and scaling,  
606 and top 25 PCs were selected based on the statistical significance of the fraction of total  
607 variance explained by each of them, which was estimated using jackstraw [47]. We  
608 used the top 25 PCs as input for subsequent t-Distributed Stochastic Neighbor  
609 Embedding (t-SNE) analysis. To have a stable t-SNE visualization, we tried a lot of  
610 combinations of parameters (perplexing [10, 15, 20, 25, 30], early exaggeration [12, 15,  
611 20], learning rate [200, 300, 400, 500, 600, 800] and 50 random seeds) using *sklearn*  
612 [46], and found they generally gave very similar results. We finally chose perplexing:15,  
613 early exaggeration:12, learning rate:500 to generate the t-SNE plots shown in the  
614 figures. Next, Density-based spatial clustering algorithm, DBSCAN [48] with  
615 parameters  $\text{eps}=5$  and  $\text{MinPts}=5$  was applied on the resulting two-dimensional t-SNE  
616 map to group the single cells into cliques (Figure S1G). After removing singletons, we  
617 examined each single cell clique in order of clique size with following criteria: 1. only  
618 cells with consistent cluster/cliQUE labels generated by hierarchical clustering using the  
619 top expressed genes and by DBSCAN were retained; 2. differential expression analysis  
620 of single cells in clique 3 (C3) compared the single cells in other cliques demonstrated  
621 that the single cells in C3 should be excluded because they highly expressed cell cycle  
622 related genes (Figure S1I). Finally, we kept 4467 high-quality mouse single cells for  
623 downstream analysis, and the cell type labels were inferred from the marker genes  
624 highly expressed in each single cell clique (Figure S1H).

625

626 *Differential expression analysis and gene set enrichment analysis*

627 MAST [17] was used to perform differential expression analysis between male and  
628 female or between T2D and healthy scRNA-seq profiles of  $\beta$  cells. Cellular detection  
629 rate (CDR, which means the number of genes detected in each single cell) was  
630 controlled as a covariate while estimating treatment effects. Significantly regulated  
631 genes were identified by using false discovery rate  $\leq 0.05$  as cutoff. For identification  
632 of functional pathways enriched in the detected differentially expressed genes between  
633 different sexes or between T2D and healthy conditions in our scRNA-seq data, we  
634 performed gene set enrichment analysis (GSEA) [19] on genes ranked based on their z-  
635 statistics, which were derived by mapping their MAST p-values to the standard normal  
636 distribution and using the sign of the  $\text{Log}_2(\text{fold change})$  of their expression values to  
637 represent the direction of regulation. Technically, the z-statistic of each gene was  
638 calculated as:

$$639 \quad \text{qnorm}(p) \times \text{sign}(\text{lfc})$$

640 where p and lfc are p-value and  $\text{Log}_2(\text{fold change})$  of this gene obtained from MAST  
641 output, qnorm is the standard normal quantile function and sign is the signum function.  
642 KEGG pathways [49] were used as input gene sets for GSEA, and *fd*r cutoff of 0.25  
643 was used to select statistically significant pathways.

644

#### 645 **Accession number**

646 Raw data (Fastq files) for single pancreatic  $\beta$  cell RNA-seq in this study have been  
647 submitted to National Omics Data Encyclopedia (NODE) with accession number  
648 OEP000892.

649

#### 650 **Authors' contributions**

651 GL and WL designed the research; GL, YL, TZ, ML performed the research and data  
652 analysis; GL, SL, SL and MX performed animal experiments; GL, TZ, SL prepared

653 samples for single-cell RNA sequencing; WL, ZS and WS supervised all aspects of the  
654 study; GL and WL wrote the manuscript.

655

### 656 **Competing interests**

657 The authors have declared no competing interests.

658

### 659 **Acknowledgments**

660 This work was supported by the National Key Research and Development Program of  
661 China (2016YFA0102200, 2017YFA0106500, 2018YFA0107102) awarded to WL;  
662 and the National Key Research and Development Program of China  
663 (2018YFA0107602) awarded to ZS; WS is supported by the Funding Project of  
664 National Key Research and Development Program of China (2018YFD0900604),  
665 Natural Science Foundation of China (41676119, 41476120) and start-up fund from  
666 Ocean University of China.

667

668

669 **References**

- 670 [1] Zucker I, Beery AK. Males still dominate animal studies. *Nature* 2010;465:690.
- 671 [2] Mauvais-Jarvis F, Arnold AP, Reue K. A guide for the design of pre-clinical studies  
672 on sex differences in metabolism. *Cell Metabolism* 2017;25:1216-30.
- 673 [3] Clayton JA, Collins FS. Policy: NIH to balance sex in cell and animal studies.  
674 *Nature* 2014;509:282-3.
- 675 [4] Zhang Q, Bengtsson M, Partridge C, Salehi A, Braun M, Cox R, et al. R-type  
676 Ca(2+)-channel-evoked CICR regulates glucose-induced somatostatin secretion. *Nat*  
677 *Cell Biol* 2007;9:453-60.
- 678 [5] Holzer P, Reichmann F, Farzi A. Neuropeptide Y, peptide YY and pancreatic  
679 polypeptide in the gut-brain axis. *Neuropeptides* 2012;46:261-74.
- 680 [6] Vital P, Larrieta E, Hiriart M. Sexual dimorphism in insulin sensitivity and  
681 susceptibility to develop diabetes in rats. *J Endocrinol* 2006;190:425-32.
- 682 [7] Yokomizo H, Inoguchi T, Sonoda N, Sakaki Y, Maeda Y, Inoue T, et al. Maternal  
683 high-fat diet induces insulin resistance and deterioration of pancreatic beta-cell function  
684 in adult offspring with sex differences in mice. *Am J Physiol Endocrinol Metab*  
685 2014;306:E1163-75.
- 686 [8] Logue J, Walker JJ, Colhoun HM, Leese GP, Lindsay RS, McKnight JA, et al. Do  
687 men develop type 2 diabetes at lower body mass indices than women? *Diabetologia*  
688 2011;54:3003-6.
- 689 [9] Wandell PE, Carlsson AC. Gender differences and time trends in incidence and  
690 prevalence of type 2 diabetes in Sweden--a model explaining the diabetes epidemic  
691 worldwide today? *Diabetes Res Clin Pract* 2014;106:e90-2.
- 692 [10] Kautzky-Willer A, Harreiter J, Pacini G. Sex and gender differences in risk,  
693 pathophysiology and complications of Type 2 Diabetes Mellitus. *Endocr Rev*  
694 2016;37:278-316.
- 695 [11] Hall E, Volkov P, Dayeh T, Esguerra JL, Salo S, Eliasson L, et al. Sex differences  
696 in the genome-wide DNA methylation pattern and impact on gene expression,

697 microRNA levels and insulin secretion in human pancreatic islets. *Genome Biol*  
698 2014;15:522.

699 [12] Navarro G, Xu W, Jacobson DA, Wicksteed B, Allard C, Zhang G, et al.  
700 Extranuclear actions of the androgen receptor enhance glucose-stimulated insulin  
701 secretion in the male. *Cell Metab* 2016;23:837-51.

702 [13] Small KS, Todorcevic M, Civelek M, El-Sayed Moustafa JS, Wang X, Simon MM,  
703 et al. Regulatory variants at KLF14 influence type 2 diabetes risk via a female-specific  
704 effect on adipocyte size and body composition. *Nat Genet* 2018;50:572-80.

705 [14] Xin Y, Kim J, Okamoto H, Ni M, Wei Y, Adler C, et al. RNA sequencing of single  
706 human islet cells reveals Type 2 Diabetes genes. *Cell Metab* 2016;24:608-15.

707 [15] Lawlor N, George J, Bolisetty M, Kursawe R, Sun L, Sivakamasundari V, et al.  
708 Single-cell transcriptomes identify human islet cell signatures and reveal cell-type-  
709 specific expression changes in type 2 diabetes. *Genome Res* 2017;27:208-22.

710 [16] Segerstolpe A, Palasantza A, Eliasson P, Andersson EM, Andreasson AC, Sun X,  
711 et al. Single-cell transcriptome profiling of human pancreatic islets in health and Type  
712 2 Diabetes. *Cell Metab* 2016;24:593-607.

713 [17] Finak G, McDavid A, Yajima M, Deng J, Gersuk V, Shalek AK, et al. MAST: a  
714 flexible statistical framework for assessing transcriptional changes and characterizing  
715 heterogeneity in single-cell RNA sequencing data. *Genome Biol* 2015;16:278.

716 [18] Sone H, Kagawa Y. Pancreatic beta cell senescence contributes to the pathogenesis  
717 of type 2 diabetes in high-fat diet-induced diabetic mice. *Diabetologia* 2005;48:58-67.

718 [19] Subramanian A, Tamayo P, Mootha VK, Mukherjee S, Ebert BL, Gillette MA, et  
719 al. Gene set enrichment analysis: a knowledge-based approach for interpreting genome-  
720 wide expression profiles. *Proc Natl Acad Sci USA* 2005;102.

721 [20] Arystarkhova E, Liu YB, Salazar C, Stanojevic V, Clifford RJ, Kaplan JH, et al.  
722 Hyperplasia of pancreatic beta cells and improved glucose tolerance in mice deficient  
723 in the FXVD2 subunit of Na,K-ATPase. *Journal of Biological Chemistry*  
724 2013;288:7077-85.

- 725 [21] Alam M-u, Harken JA, Knorn A-M, Elford AR, Wigmore K, Ohashi PS, et al.  
726 Transgenic expression of Hsc70 in pancreatic islets enhances autoimmune diabetes in  
727 response to  $\beta$  cell damage. *The Journal of Immunology* 2009;183:5728-37.
- 728 [22] Davidson HW, Hutton JC. The insulin-secretory-granule carboxypeptidase H.  
729 Purification and demonstration of involvement in proinsulin processing. *Biochemical*  
730 *Journal* 1987;245:575-82.
- 731 [23] Pound LD, Oeser JK, O'Brien TP, Wang Y, Faulman CJ, Dadi PK, et al. G6PC2: a  
732 negative regulator of basal glucose-stimulated insulin secretion. *Diabetes*  
733 2013;62:1547-56.
- 734 [24] Cooper GJ, Willis AC, Clark A, Turner RC, Sim RB, Reid KB. Purification and  
735 characterization of a peptide from amyloid-rich pancreases of type 2 diabetic patients.  
736 *Proceedings of the National Academy of Sciences* 1987;84:8628.
- 737 [25] Jang I, Pottekat A, Poothong J, Yong J, Lagunas-Acosta J, Charbono A, et al.  
738 PDIA1/P4HB is required for efficient proinsulin maturation and  $\beta$  cell health in  
739 response to diet induced obesity. *Elife* 2019;8.
- 740 [26] Larsson MH, Hakansson P, Jansen FP, Magnell K, Brodin P. Ablation of TRPM5  
741 in mice results in reduced body weight gain and improved glucose tolerance and  
742 protects from excessive consumption of sweet palatable food when fed high caloric  
743 diets. *PLoS One* 2015;10:e0138373.
- 744 [27] Ouchi N, Higuchi A, Ohashi K, Oshima Y, Gokce N, Shibata R, et al. Sfrp5 Is an  
745 anti-inflammatory adipokine that modulates metabolic dysfunction in obesity. *Science*  
746 2010;329:454-7.
- 747 [28] Carstensen-Kirberg M, Kannenberg JM, Huth C, Meisinger C, Koenig W, Heier  
748 M, et al. Inverse associations between serum levels of secreted frizzled-related protein-  
749 5 (SFRP5) and multiple cardiometabolic risk factors: KORA F4 study. *Cardiovasc*  
750 *Diabetol* 2017;16:109.

- 751 [29] Skelly DA, Squiers GT, McLellan MA, Bolisetty MT, Robson P, Rosenthal NA, et  
752 al. Single-cell transcriptional profiling reveals cellular diversity and  
753 intercommunication in the mouse heart. *Cell Rep* 2018;22:600-10.
- 754 [30] Ransick A, Lindstrom NO, Liu J, Zhu Q, Guo JJ, Alvarado GF, et al. Single-cell  
755 profiling reveals sex, lineage, and regional diversity in the mouse kidney. *Dev Cell*  
756 2019;51:399-413 e7.
- 757 [31] Klein SL, Flanagan KL. Sex differences in immune responses. *Nature Reviews*  
758 *Immunology* 2016;16:626-38.
- 759 [32] Lobentanzer S, Hanin G, Klein J, Soreq H. Integrative transcriptomics reveals  
760 sexually dimorphic control of the cholinergic/neurokinin interface in schizophrenia and  
761 bipolar disorder. *Cell Rep* 2019;29:764-77 e5.
- 762 [33] Mauvais-Jarvis F, Clegg DJ, Hevener AL. The role of estrogens in control of  
763 energy balance and glucose homeostasis. *Endocrine reviews* 2013;34:309-38.
- 764 [34] Tramunt B, Smati S, Grandgeorge N, Lenfant F, Arnal J-F, Montagner A, et al. Sex  
765 differences in metabolic regulation and diabetes susceptibility. *Diabetologia*  
766 2020;63:453-61.
- 767 [35] Tiano JP, Mauvais-Jarvis F. Importance of oestrogen receptors to preserve  
768 functional  $\beta$ -cell mass in diabetes. *Nature reviews. Endocrinology* 2012;8:342-51.
- 769 [36] Handgraaf S, Dusaulcy R, Visentin F, Philippe J, Gosmain Y. 17- $\beta$  Estradiol  
770 regulates proglucagon-derived peptide secretion in mouse and human  $\alpha$ - and L cells.  
771 *JCI insight* 2018;3:e98569.
- 772 [37] Basaria S, Muller DC, Carducci MA, Egan J, Dobs AS. Hyperglycemia and insulin  
773 resistance in men with prostate carcinoma who receive androgen-deprivation therapy.  
774 *Cancer* 2006;106:581-8.
- 775 [38] Mauvais-Jarvis F. Estrogen and androgen receptors: regulators of fuel homeostasis  
776 and emerging targets for diabetes and obesity. *Trends Endocrinol Metab* 2011;22:24-  
777 33.

- 778 [39] Zmuda EJ, Powell CA, Hai T. A method for murine islet isolation and subcapsular  
779 kidney transplantation. *J Vis Exp* 2011.
- 780 [40] Dobin A, Davis CA, Schlesinger F, Drenkow J, Zaleski C, Jha S, et al. STAR:  
781 ultrafast universal RNA-seq aligner. *Bioinformatics (Oxford, England)* 2013;29:15-21.
- 782 [41] Pruitt KD, Tatusova T, Maglott DR. NCBI Reference Sequence (RefSeq): a curated  
783 non-redundant sequence database of genomes, transcripts and proteins. *Nucleic Acids*  
784 *Research* 2005;33:D501-D4.
- 785 [42] Smith T, Heger A, Sudbery I. UMI-tools: modeling sequencing errors in Unique  
786 Molecular Identifiers to improve quantification accuracy. *Genome Res* 2017;27:491-9.
- 787 [43] Liao Y, Smyth GK, Shi W. featureCounts: an efficient general purpose program for  
788 assigning sequence reads to genomic features. *Bioinformatics* 2014;30:923-30.
- 789 [44] Park J, Shrestha R, Qiu C, Kondo A, Huang S, Werth M, et al. Single-cell  
790 transcriptomics of the mouse kidney reveals potential cellular targets of kidney disease.  
791 *Science* 2018;360:758-63.
- 792 [45] Huang M, Wang J, Torre E, Dueck H, Shaffer S, Bonasio R, et al. SAVER: gene  
793 expression recovery for single-cell RNA sequencing. *Nat Methods* 2018;15:539-42.
- 794 [46] Pedregosa F, Varoquaux G, Gramfort A, Michel V, Thirion B, Grisel O, et al. Scikit-  
795 learn: machine learning in Python. *Journal of Machine Learning Research*  
796 2011;12:2825-30.
- 797 [47] Chung NC, Storey JD. Statistical significance of variables driving systematic  
798 variation in high-dimensional data. *Bioinformatics (Oxford, England)* 2015;31:545-54.
- 799 [48] Ester M, Kriegel HP, Sander J, Xu X (1996), 'A Density-Based Algorithm for  
800 Discovering Clusters in Large Spatial Databases with Noise', *Proceedings of the Second*  
801 *International Conference on Knowledge Discovery and Data Mining*, pp. 226-31.
- 802 [49] Kanehisa M, Goto S. KEGG: kyoto encyclopedia of genes and genomes. *Nucleic*  
803 *Acids Res* 2000;28:27-30.
- 804
- 805



## 806 **Figure legends**

### 807 **Figure 1 Identification of $\beta$ cells from mouse islet cells**

808 **A.** Schematic diagram for mouse single  $\beta$  cell RNA-seq data preparation and analysis.  
809 Mouse single living islet cells are labelled by Calcein Blue, AM, and collected through  
810 Fluorescence activated cell sorting (FACS).  $\beta$  cells are sorted out and divided into  
811 different groups according to donor conditions. 8W, 8-week-old; 9M, 9-month-old. **B.**  
812 t-SNE map of cells from mouse in different conditions. The cells from healthy and T2D  
813 mice are colored with different red-colored items. **C.** Mouse  $\beta$  cells are identified by  
814 highly expressed marker gene *Ins2*. **D.** Mouse  $\beta$  cells are colored by sex information.  
815 And the expression of  $\beta$  cell marker *Ins2* is significantly different between cells of  
816 males and females (K-S test) as shown in the box plot.

817

### 818 **Figure 2 Sex-biased gene expression in $\beta$ cells of healthy and T2D mice**

819 **A.** Comparison between  $\beta$  cells of male and female 8-week-old (8W) C57 mice. In the  
820 MA plot, the sex-biased genes are highlighted by blue (male-biased) and red (female-  
821 biased) dots. See also Table S1. **B.** Nested pie chart depicting genomic location of sex-  
822 biased genes. **C.** Diabetes associated physiological phenotypes. Body weight, fasting  
823 insulin serum level are detected. The blue line represents the sample of male healthy  
824 (n=5) and male T2D (n=4); red line represents the sample of female healthy (n=4) and  
825 female T2D (n=5). Results are presented as mean  $\pm$  SEM; \*  $p \leq 0.05$ , \*\*  $p \leq 0.01$ , two  
826 sample t-test. **D.** Intraperitoneal injection glucose tolerance test with area under curve  
827 (AUC). Results are presented as mean  $\pm$  SEM; \*  $p \leq 0.05$ , \*\*  $p \leq 0.01$ ; \*\*\*  $p \leq 0.001$ .  
828 Red \*, \*\*, \*\*\* represent female T2D (n=5) versus female healthy (n=4) mice; blue \*,  
829 \*\*, \*\*\* represent male T2D (n=4) versus male healthy (n=5) mice, two sample t-test.  
830 **E.** Comparisons between male and female  $\beta$  cells of 9-month-old (9M) healthy and T2D  
831 mice. In the MA plots, sex-biased genes are highlighted by blue (male-biased) and red  
832 (female-biased) dots. See also Table S1. **F.** Heatmap of genes selected from sex-biased  
833 genes that overlapped with the leading-edge genes of GSEA. See also Table S1.

834 **Figure 3 T2D altered genes and pathways in mouse  $\beta$  cells**

835 **A.** Venn diagram depicting the definition of sex-independent and sex-dependent T2D  
836 altered genes. See also Table S2. **B.** Heatmap of sex-dependent and sex-independent  
837 T2D altered genes. The left heatmap shows the mean of z-score of expression across  
838 cells in each group, and the right heatmap shows the z-statistics of these genes derived  
839 by mapping their MAST p-values to the standard normal distribution. The signs indicate  
840 the direction they are regulated in both sexes. **C.** Results of GSEA showing pathways  
841 significantly enriched in the healthy group and the T2D group in male (labeled in blue)  
842 and female (labeled in red). Pathways with NES>0 are enriched in T2D  $\beta$  cells and  
843 pathways with NES<0 are enriched in healthy  $\beta$  cells. **D.** GSEA plots of pathways  
844 involved in the onset of diabetes or the function of  $\beta$  cell. **E.** Heatmap of leading-edge  
845 genes of the selected pathways. The sex-dependent T2D altered genes are highlighted  
846 in corresponding colors.

847

848 **Figure 4 Comparison of sex-matched and sex-mismatched islet transplantation**

849 **A.** Schematic diagram of sex-matched and sex-mismatched islet transplantation for  
850 scRNA-seq. Single islet cells are collected for scRNA-seq 9 months post-transplant.  
851 M.Endo-islet, endogenous islets of male recipients; F.Endo-islet, endogenous islets of  
852 female recipients; Match.TX-islet, transplanted islets in male recipients; Mismatch.TX-  
853 islet, transplanted islets in female recipients. **B.** t-SNE map of endogenous and  
854 transplanted islet cells in both sex-matched and sex-mismatched transplantation, and  $\beta$   
855 cells are identified by highly expressed *Ins2*. Details see also Figure S2A. **C.** Scatterplot  
856 depicting correlation of Log<sub>2</sub>(fold change) generated by comparing  $\beta$  cells of TX- $\beta$   
857 (sex-matched or sex-mismatched) and endo- $\beta$ . M.Endo- $\beta$ , endogenous  $\beta$  cells of male  
858 recipients; F.Endo- $\beta$ , endogenous  $\beta$  cells of female recipients; Match.TX- $\beta$ , sex-  
859 matched transplant- $\beta$  cells in male recipients; Mismatch.TX- $\beta$ , sex-mismatched  
860 transplant- $\beta$  cells in female recipients. **D.** Pathways enriched in sex-matched transplant-  
861  $\beta$  cells. Leading-edge genes of longevity regulating pathway are zoomed in with heat-

862 map. M.Endo- $\beta$ , endogenous  $\beta$  cells of male recipients; F.Endo- $\beta$ , endogenous  $\beta$  cells  
863 of female recipients; Match.TX- $\beta$ , sex-matched transplant- $\beta$  cells in male recipients;  
864 Mismatch.TX- $\beta$ , sex-mismatched transplant- $\beta$  cells in female recipients. **E.** Schematic  
865 diagram of sex-matched and sex-mismatched islet transplantation for  $\beta$  cell functional  
866 test in STZ induced diabetic mouse. **F.** Oral glucose tolerance test (OGTT) for mice  
867 after sex-matched (n=3 mice) and sex-mismatched (n=4 mice) islet transplantation and  
868 results are summarized by the area under curve (AUC). 2 g/Kg glucose is gavaged after  
869 6 hours fasting, and blood glucose level is detected at 0, 15, 30, 60, 120 minutes after  
870 glucose gavage. Results are presented as mean $\pm$ SEM; \*  $p \leq 0.05$ , two sample t-test. TX,  
871 transplantation.

872

873 **Table 1 The number of collected cells from mice in different conditions**

874

## 875 **Supplementary material**

876 **Figure S1 Data processing for the identification of  $\beta$  cell**

877 **A.** Distribution of detected gene numbers (Log<sub>2</sub> transformed). 810 out of 5472 cells are  
878 removed from further analysis due to number of genes with more than 1 UMI count  
879 less than 500. **B.** Distribution of total exon counts (Log<sub>2</sub> transformed). The retained  
880 cells (shown in orange) have relatively higher exon counts. **C.** Distribution of UMI  
881 fractions of mitochondrial genes (Log<sub>2</sub> transformed). The retained cells (shown in  
882 orange) have relatively lower UMI fractions of mitochondrial genes. **D.** Boxplot of  
883 fraction of UMI count of top k most expressed genes. The fraction is beyond 0.5 for  
884 most cells when k = 2 Each gray line represents a cell. **E.** Distribution of UMI count  
885 fraction of top 1 (shown in red) and top 2 (shown in blue) most expressed genes. In  
886 86.7% of the mouse islet cells, the UMI count fraction of the top 2 most expressed  
887 genes are more than 0.5. The union of the top 2 most expressed genes from all these  
888 cells includes 9 genes (*Gcg*, *Ins1*, *Ins2*, *Malat1*, *Ppy*, *Pyy*, *Rn45s*, *Ttr*, *mt-Rnr2*), which  
889 are excluded while calculating total count for normalization using adjCPM method. **F.**

890 Hierarchical clustering for 4,662 mouse islet single cells. Using union of the top 10  
891 expressed genes in all cells (total 141 genes) with “euclidean” metric and “complete”  
892 linkage and 110 cells are excluded. 8W, 8-week-old; 9M, 9-month-old; 11M, 11-  
893 month-old; Endo-islet, endogenous islets of recipients; TX-islet, transplanted islets in  
894 recipients. **G.** t-SNE map of retained cells. Cells are colored by the clustering result of  
895 the previous hierarchical clustering (up panel), conditions (middle panel) and clique  
896 labels from DBSCAN clustering (down panel), respectively. **H.** Violin plots of marker  
897 genes for C0, C1, C2, C4, C5 after filtering cells with inconsistent cluster labels given  
898 by previous hierarchical clustering. C1: *Ins2* (a known marker gene of  $\beta$  cells) highly  
899 expressing cells from mice of C57 strain (labeled as  $\beta$  cells); C2: *Ins2* highly expressing  
900 cells from 11-month-old mice of ICR strain (labeled as  $\beta$  cells); C0: *Gcg* (a known  
901 marker gene of  $\alpha$  cells) highly expressing cells (labeled as  $\alpha$  cells); C4 and C5: two  
902 groups of cells with high expression of *Slc34a1* and *Pvalb* (two known marker genes  
903 of kidney proximal tubule and distal convoluted tubule cells), respectively, which were  
904 labeled as kidney-like cells and were discarded. **I.** GO enrichment analysis for up- and  
905 down-regulated genes in C3. Key metabolic processes such as ATP biosynthetic  
906 process associated genes are down-regulated and cell cycle related genes are up-  
907 regulated in C3, so this clique is removed as cells in cell cycle.

908

909 **Figure S2 Sexually dimorphic gene expression and gene set enrichment in  $\beta$  cells**

910 **A.** Barplot showing the cell type composition of male and female mice under different  
911 conditions. 8W, 8-week-old; 9M, 9-month-old; 11M, 11-month-old; Endo-islet,  
912 endogenous islets of recipients; TX-islet, transplanted islets in recipients. **B.** t-SNE map  
913 of retained mouse cells colored by expression of sex chromosome linked genes. The  
914 reds for X-chromosome linked gene *Xist*, and the blues for Y-chromosome linked genes  
915 *Eif2s3y*, *Ddx3y*, *Uty*. **C.** GSEA for sex comparisons of  $\beta$  cells from 8-week-old C57  
916 mice. The gene sets with NES > 0 are enriched in males and NES < 0 in females. **D.**  
917 GSEA for sex comparisons of  $\beta$  cells from healthy 9-month-old C57 mice. The gene

918 sets with  $NES > 0$  are enriched in males and  $NES < 0$  in females. **E.** GSEA for sex  
919 comparisons of  $\beta$  cells from T2D 9-month-old C57 mice. The gene sets with  $NES > 0$   
920 are enriched in males and  $NES < 0$  in females.

921

922 **Figure S3 Sexually dimorphic genes in  $\beta$  cells from T2D model and transplanted**  
923 **islet**

924 **A.** Violin plots of sex-dependent genes in mouse  $\beta$  cells. Top 5 significantly up-  
925 regulated and down-regulated T2D altered genes in each group are selected according  
926 to the value of FDR. **B.** Violin plots of sex-dependent T2D altered genes involved in  
927 ribosome pathway. The left 3 down-regulated genes in female T2D  $\beta$  cells are female-  
928 dependent T2D altered genes; the right 11 up-regulated genes in T2D  $\beta$  cells are male-  
929 dependent T2D altered genes. **C.** MA plot showing the comparison between sex  
930 matched and mismatched transplant- $\beta$  cells. Up-regulated and down-regulated genes in  
931 sex matched transplant- $\beta$  cells are highlighted in blue and red, respectively. See also in  
932 Table S2. TX- $\beta$ , transplant- $\beta$  cells. **D.** Violin plot of expression of *Sfrp5* in endogenous  
933 and transplanted  $\beta$  cells. M.Endo- $\beta$ , endogenous  $\beta$  cells from male recipient; F.Endo- $\beta$ ,  
934 endogenous  $\beta$  cells from female recipient; Match.TX- $\beta$ , sex matched transplant- $\beta$  cells;  
935 Mismatch.TX- $\beta$ , sex mismatched transplant- $\beta$  cells. **E.** Blood glucose level before and  
936 after islet transplantation in diabetic mice. The blood glucose level of diabetic mice  
937 with sex-matched (blue) and sex-mismatched (red) transplanted islet are all recovered  
938 normal (green baseline) from hyperglycemia (orange baseline) about 3 weeks after  
939 transplantation. TX, transplantation.

940

941 **Table S1 Sex-biased genes and genes overlapped with leading-edge genes of**  
942 **enriched gene sets**

943 **Table S2 Sex-independent, sex-dependent T2D altered genes and DEGs of**  
944 **transplant- $\beta$  cells**

945 **Table S3 Primer sequence for library construction**
